# Supplementary material for: Mothers’ experiences of quality of care and potential benefits of implementing the WHO safe childbirth checklist: a case study of Aceh Indonesia
Source: Springer Nature journal article supplement (doi:10.1186/s12884-019-2625-8), 2019-12-01
Supplement: MOESM2 [file 17463782]

## Additional file 2

**Table S1.** Maternal care indicators among women aged 15-49 in Aceh province, Indonesia DHS 2017 (28).

| Indicator                                                               | % Rate |
|-------------------------------------------------------------------------|--------|
| Receiving antenatal care from a skilled provider*                       | 96.5   |
| Receiving antenatal care from a skilled provider, at least four visits* | 63.3   |
| Had complications associated with the pregnancy*                        | 18.2   |
| Delivered in a health facility*                                         | 78.7   |
| Delivered by a skilled provider*                                        | 84.5   |
| Delivery by C-section                                                   | 21.6   |
| Neonatal mortality**                                                    | 19     |
| Post-neonatal mortality**                                               | 11     |
| Had postnatal check during the first 2 days after birth*                | 85.2   |
| Ever breastfed last-born children born in the past 2 years*             | 92.7   |
| Current use of modern contraception (all and currently married women)   | 41.4   |

\*Had a live birth in the 5 years preceding the survey.

\*\*Per 1,000 live births for the 10-year period preceding the survey.

**Table S2.** Provision of healthcare in Aceh province 2017 (29).

| Indicator                                                                       | Value |
|---------------------------------------------------------------------------------|-------|
| Ratio of hospital beds per 1,000 population                                     | 1.72  |
| Percentage of community health centres with fair/excessive number of physicians | 87.02 |
| Percentage of community health centres with fair/excessive number of nurses     | 84.96 |
| Percentage of community health centres with fair/excessive number of midwives*  | 95.87 |
| Number of obstetric gynaecologists at hospitals per 1,000 population            | 0.03  |
| Number of midwives at hospitals per 1,000 population                            | 0.49  |

\*An outpatient health center is required to employ at minimum four midwives, while an inpatient health center seven midwives.

**Table S3.** Summary characteristics of facilities included in the main study population and interview sample stratified by facility type (annual figures for August 2015 to July 2016).

|                                                             | Study population*<br>(N = 29) | Interview sample<br>(N = 7) |
|-------------------------------------------------------------|-------------------------------|-----------------------------|
| Median number of obstetricians/gynecologists part/full-time |                               |                             |
| Puskesmas                                                   | 0                             | 0                           |
| Public hospital                                             | 5                             | 8                           |
| Private hospital                                            | 2                             | 3                           |
| Median number of midwives part/full-time                    |                               |                             |
| Puskesmas                                                   | 16.5                          | 37                          |
| Public hospital                                             | 17                            | 23.5                        |
| Private hospital                                            | 10.5                          | 13                          |
| Median number of total staff (part/full-time)               |                               |                             |
| Puskesmas                                                   | 16.5                          | 37                          |
| Public hospital                                             | 24                            | 32.5                        |
| Private hospital                                            | 14                            | 16                          |
| Median number of labor rooms                                |                               |                             |
| Puskesmas                                                   | 1                             | 1                           |
| Public hospital                                             | 1                             | 2                           |
| Private hospital                                            | 1                             | 1                           |
| Median number of operation theaters                         |                               |                             |
| Puskesmas                                                   | 0                             | 0                           |
| Public hospital                                             | 2                             | 2.5                         |
| Private hospital                                            | 1                             | 1                           |
| Median number of Bedsides for mothers                       |                               |                             |
| Puskesmas                                                   | 4                             | 8                           |
| Public hospital                                             | 6                             | 6                           |
| Private hospital                                            | 8.5                           | 3.5                         |
| Median number of inward referrals                           |                               |                             |
| Puskesmas                                                   | 25                            | 0                           |
| Public hospital                                             | 227                           | 1023                        |
| Private hospital                                            | 118                           | 1030                        |
| Median number of outward referrals                          |                               |                             |
| Puskesmas                                                   | 32.5                          | 124                         |
| Public hospital                                             | 9                             | 5.5                         |
| Private hospital                                            | 11                            | 27.5                        |
| Median number of deliveries (all type)                      |                               |                             |
| Puskesmas                                                   | 43                            | 127                         |
| Public hospital                                             | 741                           | 988.5                       |
| Private hospital                                            | 349.5                         | 940.5                       |

|                                                  |       |       |
|--------------------------------------------------|-------|-------|
| Ratio of cesarean by total deliveries (%)        |       |       |
| Puskesmas                                        | 4.26  | 0     |
| Public hospital                                  | 32.01 | 32.45 |
| Private hospital                                 | 63.22 | 75.44 |
| Ratio of maternal deaths by total deliveries (%) |       |       |
| Puskesmas                                        | 0.12  | 0     |
| Public hospital                                  | 0.38  | 0.15  |
| Private hospital                                 | 0.11  | 0.06  |
| Ratio of stillbirths by total deliveries (%)     |       |       |
| Puskesmas                                        | 1.34  | 0.79  |
| Public hospital                                  | 1.35  | 1.47  |
| Private hospital                                 | 0.81  | 0.74  |
| Ratio of newborn deaths by total deliveries (%)  |       |       |
| Puskesmas                                        | 0.24  | 0     |
| Public hospital                                  | 0.23  | 0.04  |
| Private hospital                                 | 0.73  | 0.69  |

---

\*The main RCT study also included a small number of private midwife clinics and sub-health centers (pustu) that were not included in the qualitative study due to their small proportion.
